# Supplementary material for: Tuning and tracking the growth of gold nanoparticles synthesized using binary surfactant mixtures
Source: Royal Society of Chemistry journal article supplement (doi:10.1039/d0na00214c), 2020-01-01
Supplement: d0na00214c1.pdf [file d0na00214c1.pdf]

# Tuning and tracking the growth of gold nanoparticles synthesized using binary surfactant mixtures.

*Karthik Raghunathan*<sup>†, ‡</sup>, *Jibin Antony*<sup>φ, ‡</sup>, *Sarmad Munir*<sup>¥</sup>, *Jens-Petter Andreassen*<sup>φ</sup>, *Sulalit Bandyopadhyay*<sup>φ, \*</sup>

<sup>†</sup> Ugelstad Laboratory, Department of Chemical Engineering, Norwegian University of Science and Technology, N-7491, Trondheim, Norway

<sup>φ</sup> Department of Chemical Engineering, Norwegian University of Science and Technology, N-7491, Trondheim, Norway

<sup>¥</sup> Yara International ASA, Herøya Research Park, Hydrovegen 67, 3936, Porsgrunn, Norway

<sup>‡</sup> Authors contributed equally.

Corresponding Author: [sulalit.bandyopadhyay@ntnu.no](mailto:sulalit.bandyopadhyay@ntnu.no)

**Table S1.** List of experiments performed along with corresponding first-order rate constants.

|                                                                                                                                    | Parameter studied    | pH of the solution | AsA ( $\mu\text{l}$ ) | pH of the solution after AsA | k ( $\text{s}^{-1}$ ) | S(T)EM images |
|------------------------------------------------------------------------------------------------------------------------------------|----------------------|--------------------|-----------------------|------------------------------|-----------------------|---------------|
| <b>Without AgNO<sub>3</sub></b><br><b>Seed = 96<math>\mu\text{l}</math></b>                                                        | <b>Effect of pH</b>  | 1.5                | 135                   | 1.5                          | $1.70 \times 10^{-4}$ | a1            |
|                                                                                                                                    |                      | 3.6                | 135                   | 3                            | $2.93 \times 10^{-3}$ | a2            |
|                                                                                                                                    |                      | 5                  | 135                   | 3.4                          | $3.23 \times 10^{-3}$ | a3            |
|                                                                                                                                    |                      | 7                  | 135                   | 3.4                          | $3.31 \times 10^{-3}$ | a4            |
|                                                                                                                                    |                      | 10                 | 135                   | 5.3                          | NA                    | a5            |
|                                                                                                                                    | <b>Effect of AsA</b> | NA                 | 68                    | 3.2                          | NA                    | NA            |
|                                                                                                                                    |                      | 3.6                | 135                   | 3                            | $2.93 \times 10^{-3}$ | b1            |
|                                                                                                                                    |                      | NA                 | 200                   | 3.1                          | $3.84 \times 10^{-3}$ | b2            |
|                                                                                                                                    |                      | NA                 | 270                   | 3.1                          | $3.37 \times 10^{-3}$ | b3            |
|                                                                                                                                    |                      | NA                 | 400                   | 3                            | $5.01 \times 10^{-3}$ | b4            |
| <b>With AgNO<sub>3</sub></b><br><b>AgNO<sub>3</sub> = 750 <math>\mu\text{l}</math></b><br><b>Seed = 96<math>\mu\text{l}</math></b> | <b>Effect of pH</b>  | 1.5                | 135                   | 1.5                          | $1.05 \times 10^{-4}$ | c1            |
|                                                                                                                                    |                      | 3.6                | 135                   | 3                            | $1.33 \times 10^{-3}$ | c2            |
|                                                                                                                                    |                      | 5                  | 135                   | 3.3                          | $1.47 \times 10^{-3}$ | c3            |
|                                                                                                                                    |                      | 7                  | 135                   | 3.4                          | $1.58 \times 10^{-3}$ | c4            |
|                                                                                                                                    |                      | 10                 | 135                   | 7.2                          | $2.73 \times 10^{-3}$ | c5            |
|                                                                                                                                    | <b>Effect of AsA</b> | NA                 | 68                    | 3.1                          | NA                    | NA            |
|                                                                                                                                    |                      | NA                 | 100                   | NA                           | $8.08 \times 10^{-4}$ | NA            |
|                                                                                                                                    |                      | NA                 | 135                   | 3                            | $1.33 \times 10^{-3}$ | d1            |

|                                                                                             |                      |     |     |     |                       |    |
|---------------------------------------------------------------------------------------------|----------------------|-----|-----|-----|-----------------------|----|
|                                                                                             |                      | NA  | 200 | 3   | $1.40 \times 10^{-3}$ | d2 |
|                                                                                             |                      | NA  | 270 | 3   | $1.47 \times 10^{-3}$ | d3 |
|                                                                                             |                      | NA  | 400 | 2.9 | $1.94 \times 10^{-3}$ | d4 |
| <b>With OA</b><br><b>AgNO<sub>3</sub> = 750µl</b><br><b>OA = 20µl</b><br><b>Seed = 96µl</b> | <b>Effect of pH</b>  | 1.5 | 135 | 1.5 | $1.41 \times 10^{-4}$ | e1 |
|                                                                                             |                      | 3.4 | 135 | 3.3 | $1.92 \times 10^{-3}$ | e2 |
|                                                                                             |                      | 5   | 135 | 4.4 | $2.98 \times 10^{-3}$ | e3 |
|                                                                                             |                      | 7   | 135 | 5.5 | $3.75 \times 10^{-3}$ | e4 |
|                                                                                             |                      | 9.3 | 135 | 5.4 | $3.90 \times 10^{-3}$ | NA |
|                                                                                             |                      | 10  | 135 | 7.1 | $6.81 \times 10^{-3}$ | e5 |
|                                                                                             | <b>Effect of AsA</b> | NA  | 68  | 3.3 | $1.48 \times 10^{-3}$ | f1 |
|                                                                                             |                      | NA  | 135 | 3.3 | $1.92 \times 10^{-3}$ | f2 |
|                                                                                             |                      | NA  | 200 | 3.3 | $2.08 \times 10^{-3}$ | f3 |
|                                                                                             |                      | NA  | 270 | 3.2 | $2.37 \times 10^{-3}$ | f4 |
|                                                                                             |                      | NA  | 400 | 3.2 | $2.69 \times 10^{-3}$ | f5 |
| <b>Double Seeded AgNO<sub>3</sub> = 750 µl</b><br><b>OA = 30 µl</b><br><b>Seed = 200µl</b>  | <b>Effect of pH</b>  | 1.5 | 135 | 1.5 | $7.54 \times 10^{-5}$ | g1 |
|                                                                                             |                      | 3.4 | 135 | 3.2 | $6.08 \times 10^{-4}$ | g2 |
|                                                                                             |                      | 5   | 135 | 4.3 | $7.31 \times 10^{-4}$ | g3 |
|                                                                                             |                      | 7   | 135 | 5.3 | $8.35 \times 10^{-4}$ | g4 |
|                                                                                             |                      | 10  | 135 | 6.1 | $1.80 \times 10^{-3}$ | g5 |
|                                                                                             | <b>Effect of AsA</b> | NA  | 68  | 3.3 | $4.86 \times 10^{-4}$ | h1 |
|                                                                                             |                      | NA  | 135 | 3.2 | $6.08 \times 10^{-4}$ | h2 |
|                                                                                             |                      | NA  | 200 | 3.2 | $6.16 \times 10^{-4}$ | h3 |

|  |  |    |     |     |                       |    |
|--|--|----|-----|-----|-----------------------|----|
|  |  | NA | 270 | 3.2 | $6.32 \times 10^{-4}$ | h4 |
|  |  | NA | 400 | 3.1 | $6.77 \times 10^{-4}$ | h5 |

**Table S2.** List of experiments performed with the data from respective Au NPs

|                                                            |                      | AsA        | pH of the solution after AsA | k (s <sup>-1</sup> )  | No. of Peaks | LSPR (nm) | Long Axis (nm) | AR  |
|------------------------------------------------------------|----------------------|------------|------------------------------|-----------------------|--------------|-----------|----------------|-----|
|                                                            |                      | ( $\mu$ l) |                              |                       |              |           |                |     |
| <b>Without AgNO<sub>3</sub> Seed = 96<math>\mu</math>l</b> | <b>Effect of pH</b>  | 135        | 1.5                          | $1.70 \times 10^{-4}$ | 1            | 534       | 64             | 2.9 |
|                                                            |                      | 135        | 3                            | $2.93 \times 10^{-3}$ | 1.5          | 534       | 39             | 1.7 |
|                                                            |                      | 135        | 3.4                          | $3.23 \times 10^{-3}$ | 1            | 531       | 53             | 2.7 |
|                                                            |                      | 135        | 3.4                          | $3.31 \times 10^{-3}$ | 1.5          | 532       | 142            | 1.3 |
|                                                            |                      | 135        | 5.3                          | NA                    | 1.5          | 524       | 36             | 1.8 |
|                                                            | <b>Effect of AsA</b> | 68         | 3.2                          | NA                    | 0            | 0         | 0              | 0   |
|                                                            |                      | 135        | 3                            | $2.93 \times 10^{-3}$ | 1.5          | 534       | 39             | 1.7 |
|                                                            |                      | 200        | 3.1                          | $3.84 \times 10^{-3}$ | 1            | 527       | 46             | 2.1 |
|                                                            |                      | 270        | 3.1                          | $3.37 \times 10^{-3}$ | 1            | 523       | 48             | 2.1 |
|                                                            |                      | 400        | 3                            | $5.01 \times 10^{-3}$ | 1            | 522       | 34             | 1.7 |
| <b>With AgNO<sub>3</sub></b>                               | <b>Effect of pH</b>  | 135        | 1.5                          | $1.05 \times 10^{-4}$ | 2            | 677       | 42             | 3.2 |
|                                                            |                      | 135        | 3                            | $1.33 \times 10^{-3}$ | 2            | 720       | 40             | 3.2 |
|                                                            |                      | 135        | 3.3                          | $1.47 \times 10^{-3}$ | 2            | 698       | 39             | 3.4 |
|                                                            |                      | 135        | 3.4                          | $1.58 \times 10^{-3}$ | 2            | 668       | 38             | 2.9 |

|                                            |                                |                                |                       |                       |                       |     |     |     |     |
|--------------------------------------------|--------------------------------|--------------------------------|-----------------------|-----------------------|-----------------------|-----|-----|-----|-----|
| <b>AgNO<sub>3</sub></b><br><b>= 750 µl</b> |                                | 135                            | 7.2                   | $2.73 \times 10^{-3}$ | 3                     | 721 | 36  | 2.8 |     |
|                                            | <b>Seed</b><br><b>96µl</b>     | <b>Effect</b><br><b>of AsA</b> | 68                    | 3.1                   | NA                    | 0   | 0   | 0   | 0   |
|                                            |                                |                                | 100                   | NA                    | $8.08 \times 10^{-3}$ | 2   | NA  | NA  | NA  |
|                                            |                                |                                | 135                   | 3                     | $1.33 \times 10^{-3}$ | 2   | 720 | 40  | 3.2 |
|                                            |                                |                                | 200                   | 3                     | $1.40 \times 10^{-3}$ | 3   | 756 | 43  | 3.4 |
|                                            |                                |                                | 270                   | 3                     | $1.47 \times 10^{-3}$ | 3   | 759 | 43  | 3.3 |
| 400                                        | 2.9                            | $1.94 \times 10^{-3}$          | 2.5                   | 724                   | 39                    | 3   |     |     |     |
| <b>With</b><br><b>OA</b>                   | <b>Effect</b><br><b>of pH</b>  | 135                            | 1.5                   | $1.41 \times 10^{-4}$ | 2                     | 761 | 51  | 3.9 |     |
|                                            |                                | 135                            | 3.3                   | $1.92 \times 10^{-3}$ | 2.5                   | 734 | 44  | 2.9 |     |
|                                            |                                | 135                            | 4.4                   | $2.98 \times 10^{-3}$ | 2.5                   | 672 | 34  | 2.2 |     |
|                                            |                                | 135                            | 5.5                   | $3.75 \times 10^{-3}$ | 2.5                   | 652 | 27  | 2.1 |     |
|                                            |                                | 135                            | 5.4                   | $3.90 \times 10^{-3}$ | 1.5                   | NA  | NA  | NA  |     |
| <b>OA</b><br><b>20µl</b>                   | <b>Effect</b><br><b>of AsA</b> | 135                            | 7.1                   | $6.81 \times 10^{-3}$ | 1.5                   | 520 | 18  | 1.1 |     |
| <b>Seed</b><br><b>96µl</b>                 |                                | 68                             | 3.3                   | $1.48 \times 10^{-3}$ | 3                     | 739 | 45  | 2.9 |     |
|                                            |                                | 135                            | 3.3                   | $1.92 \times 10^{-3}$ | 2.5                   | 734 | 44  | 2.9 |     |
|                                            |                                | 200                            | 3.3                   | $2.08 \times 10^{-3}$ | 2.5                   | 726 | 41  | 2.9 |     |
|                                            |                                | 270                            | 3.2                   | $2.37 \times 10^{-3}$ | 2.5                   | 713 | 38  | 2.6 |     |
|                                            |                                | 400                            | 3.2                   | $2.69 \times 10^{-3}$ | 2.5                   | 698 | 37  | 2.5 |     |
| <b>Effect</b><br><b>of pH</b>              | 135                            | 1.5                            | $7.54 \times 10^{-5}$ | 2                     | 689                   | 121 | 1.9 |     |     |
|                                            | 135                            | 3.2                            | $6.08 \times 10^{-4}$ | 3                     | 744                   | 112 | 1.6 |     |     |
|                                            | 135                            | 4.3                            | $7.31 \times 10^{-4}$ | 1.5                   | 688                   | 81  | 1.6 |     |     |

|                                               |                      |     |     |                       |     |     |     |     |
|-----------------------------------------------|----------------------|-----|-----|-----------------------|-----|-----|-----|-----|
| <b>Double Seeded AgNO<sub>3</sub>= 750 µl</b> |                      | 135 | 5.3 | $8.35 \times 10^{-4}$ | 1.5 | 680 | 91  | 1.5 |
|                                               | <b>OA= 30 µl</b>     | 135 | 6.1 | $1.80 \times 10^{-3}$ | 1   | 536 | 60  | 1.1 |
| <b>Seed = 200µl</b>                           | <b>Effect of AsA</b> | 68  | 3.3 | $4.86 \times 10^{-4}$ | 2   | 703 | 121 | 1.6 |
|                                               |                      | 135 | 3.2 | $6.08 \times 10^{-4}$ | 3   | 744 | 112 | 1.6 |
|                                               |                      | 200 | 3.2 | $6.16 \times 10^{-4}$ | 1.5 | 735 | 120 | 1.6 |
|                                               |                      | 270 | 3.2 | $6.32 \times 10^{-4}$ | 2   | 732 | 114 | 1.6 |
|                                               |                      | 400 | 3.1 | $6.77 \times 10^{-4}$ | 1.5 | 720 | 111 | 1.6 |

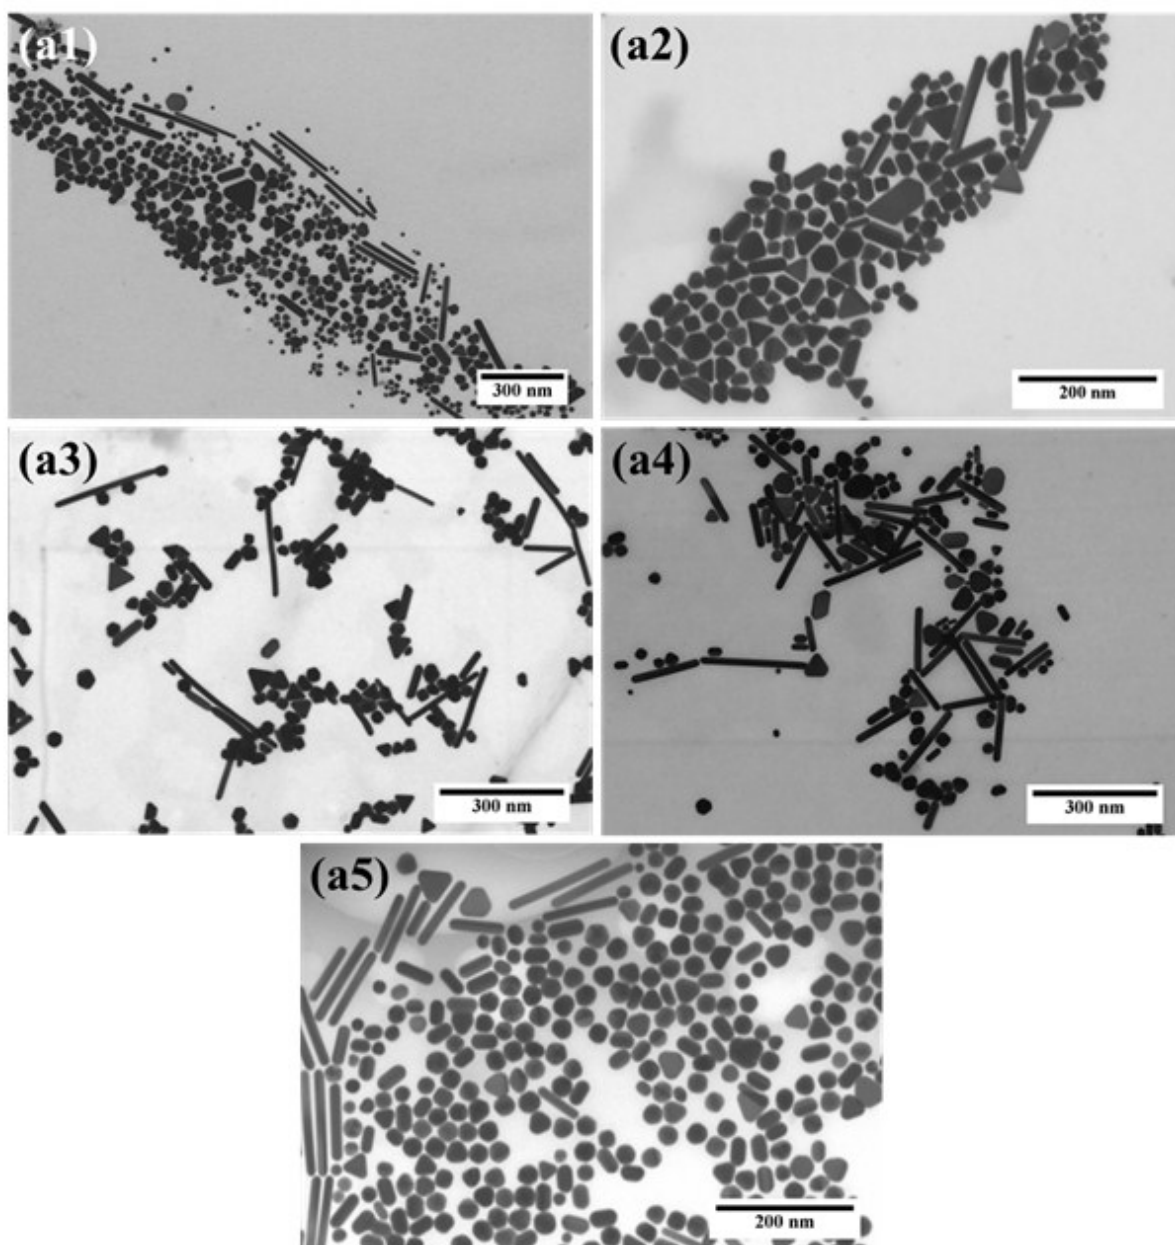

**Figure S1.** Representative S(T)EM images showing the effect of pH on Au NPs without  $\text{AgNO}_3$ .

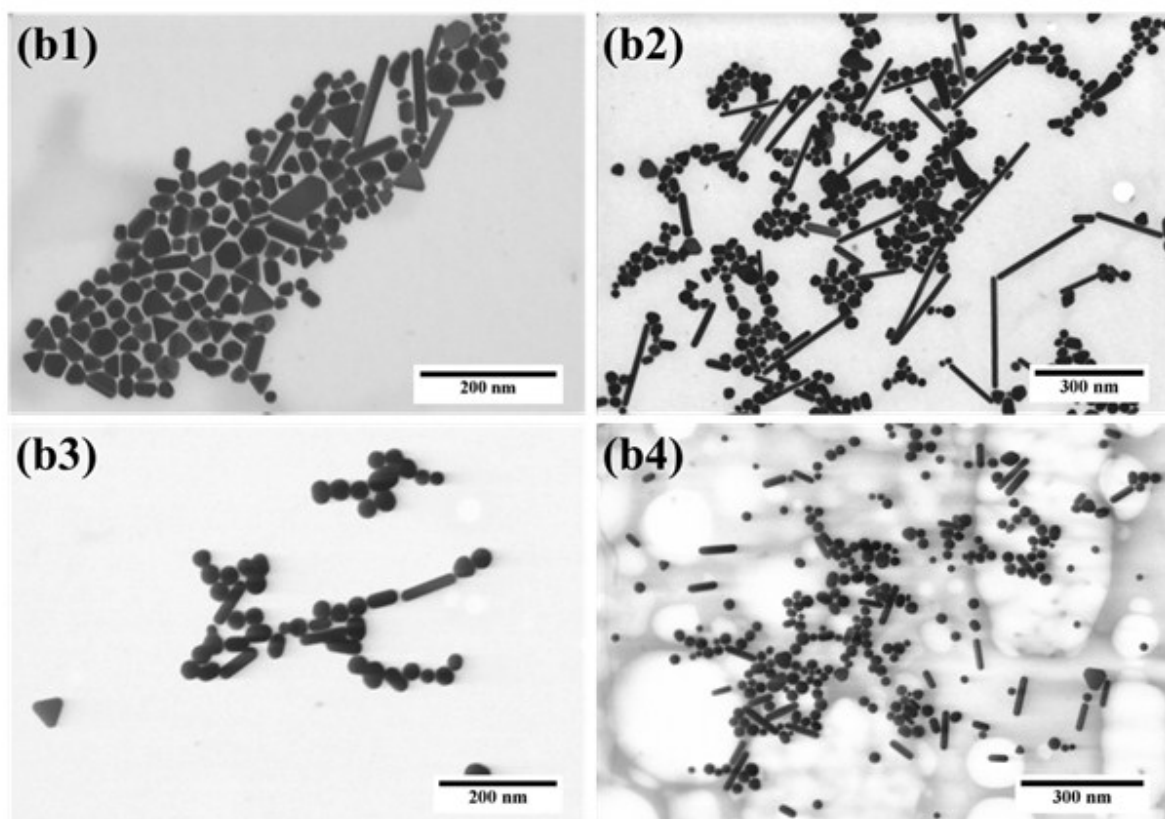

**Figure S2.** Representative S(T)EM images showing the effect of AsA on Au NPs without  $\text{AgNO}_3$ .



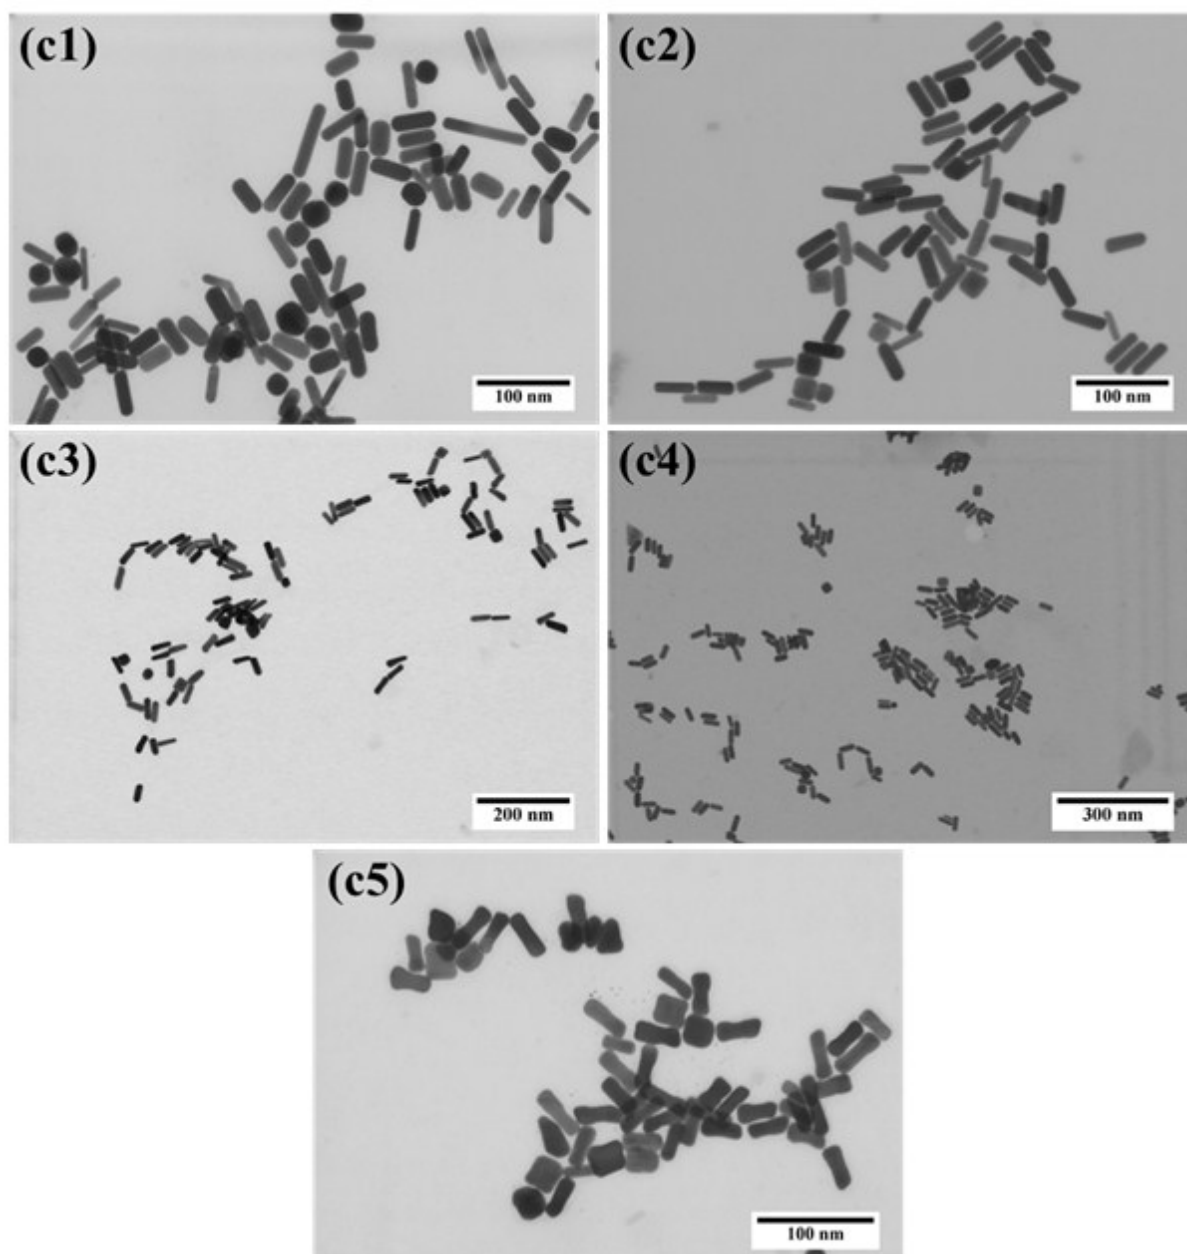

**Figure S3.** Representative S(T)EM images showing the effect of pH on Au NPs with AgNO<sub>3</sub>.

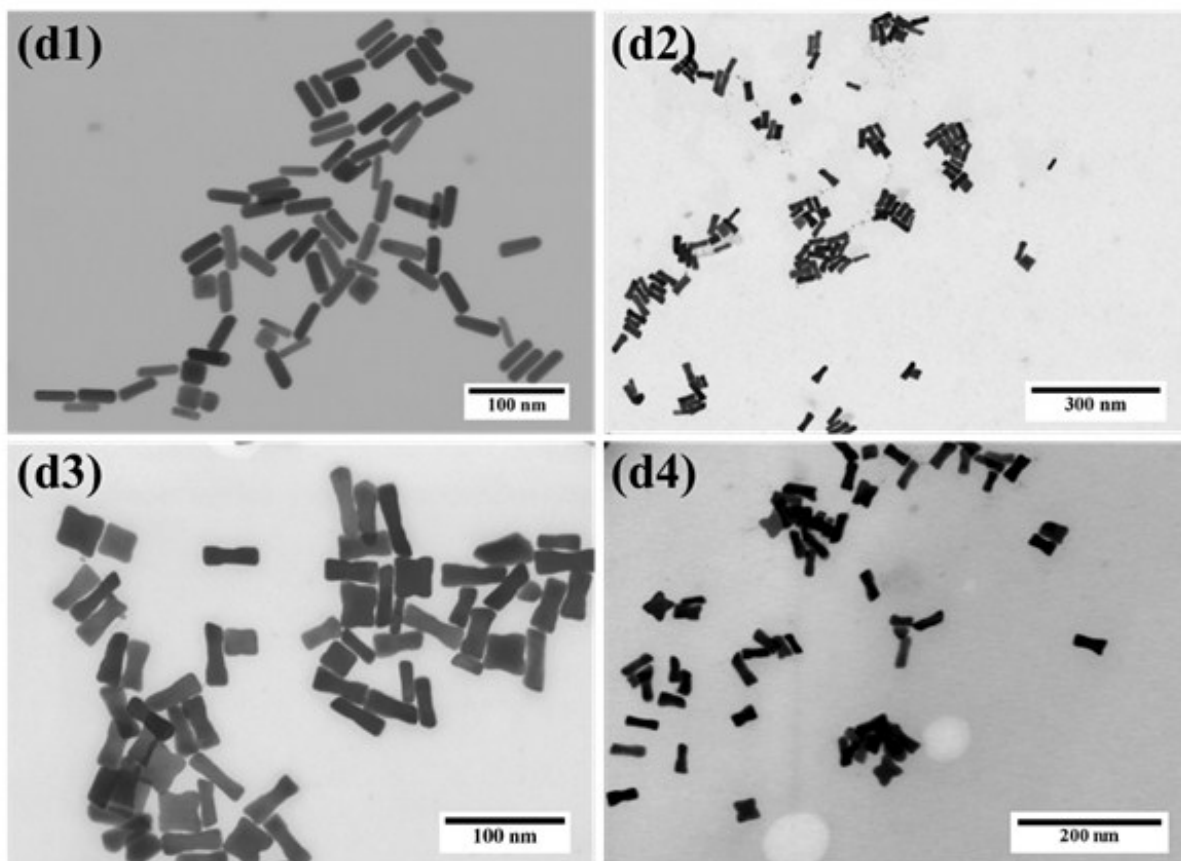

**Figure S4.** Representative S(T)EM images showing the effect of AsA on Au NPs with  $\text{AgNO}_3$ .

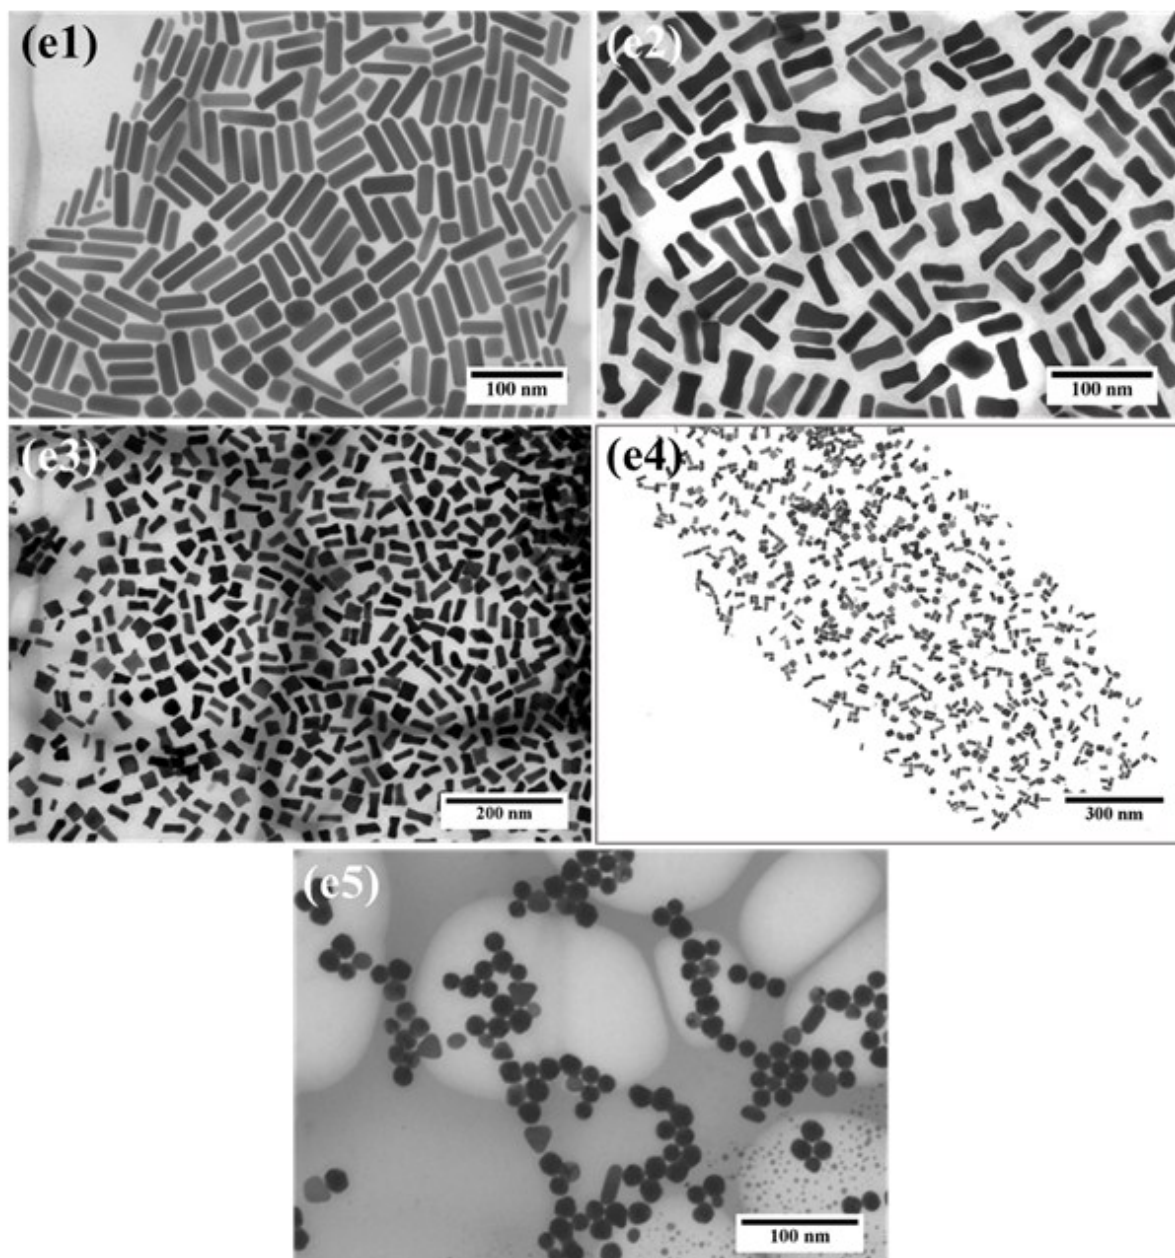

**Figure S5.** Representative S(T)EM images showing the effect of pH on Au NPs with OA.

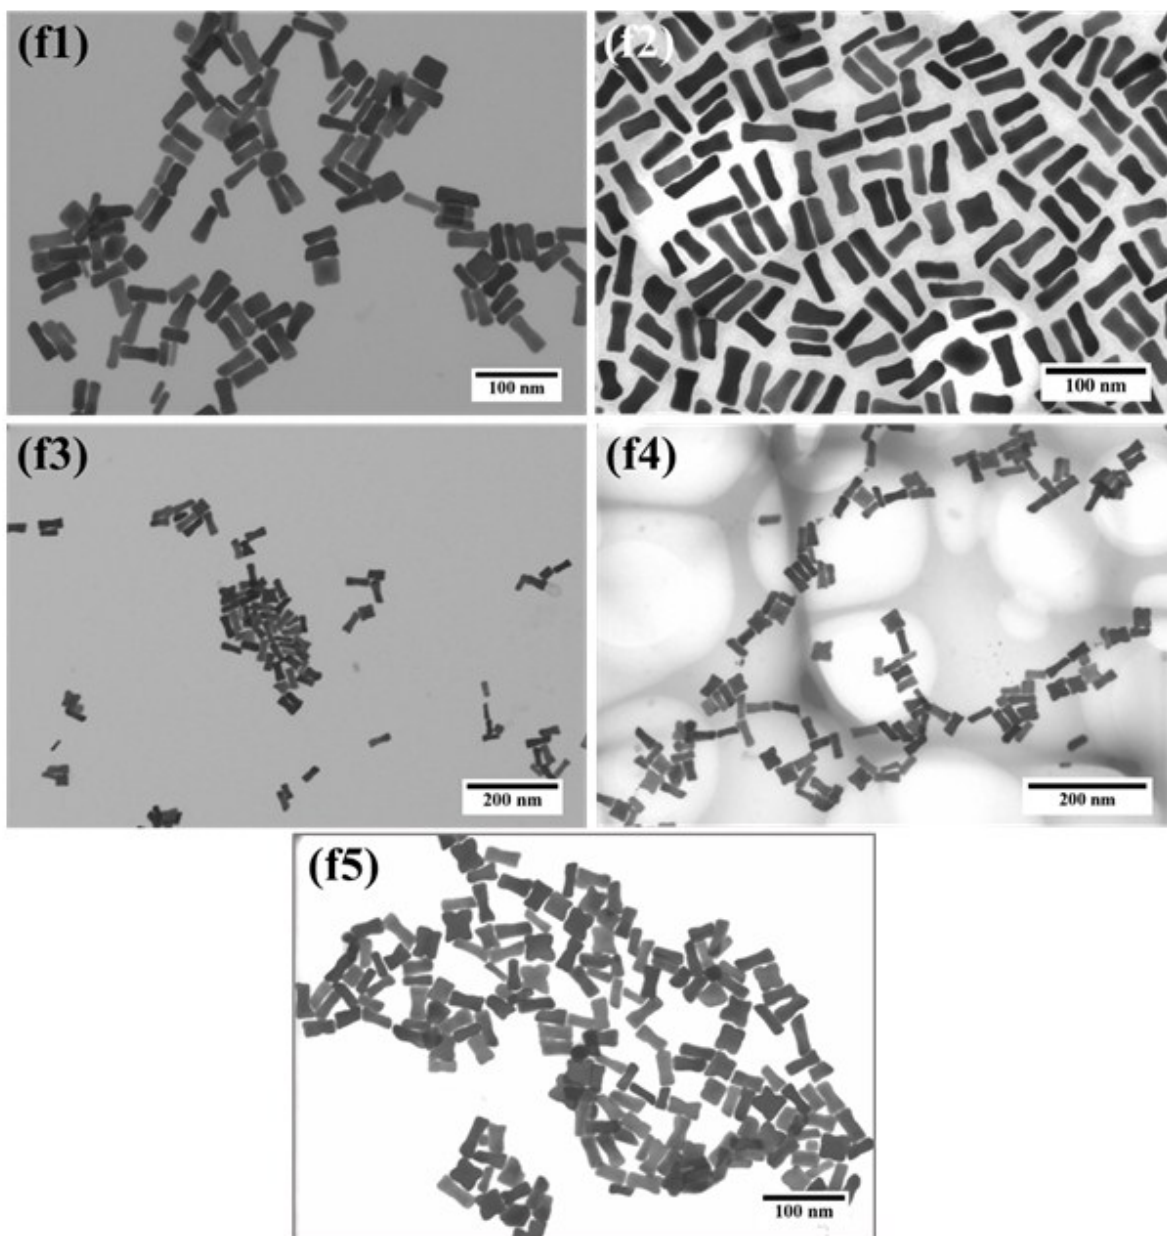

**Figure S6.** Representative S(T)EM images showing the effect of AsA on Au NPs with OA.

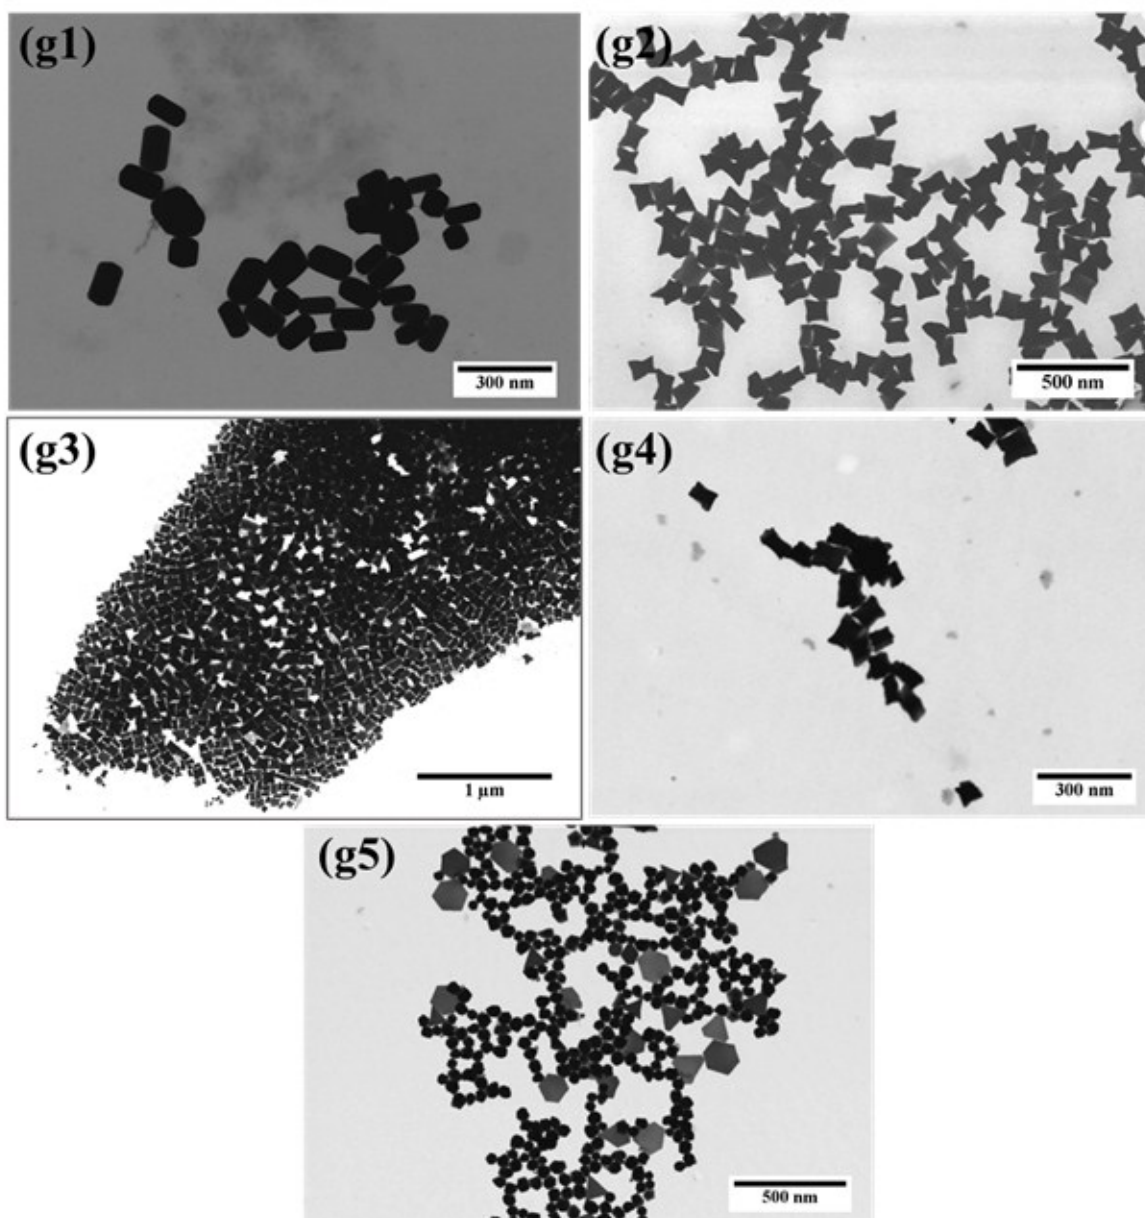

**Figure S7.** Representative S(T)EM images showing the effect of pH on double seeded Au NPs.

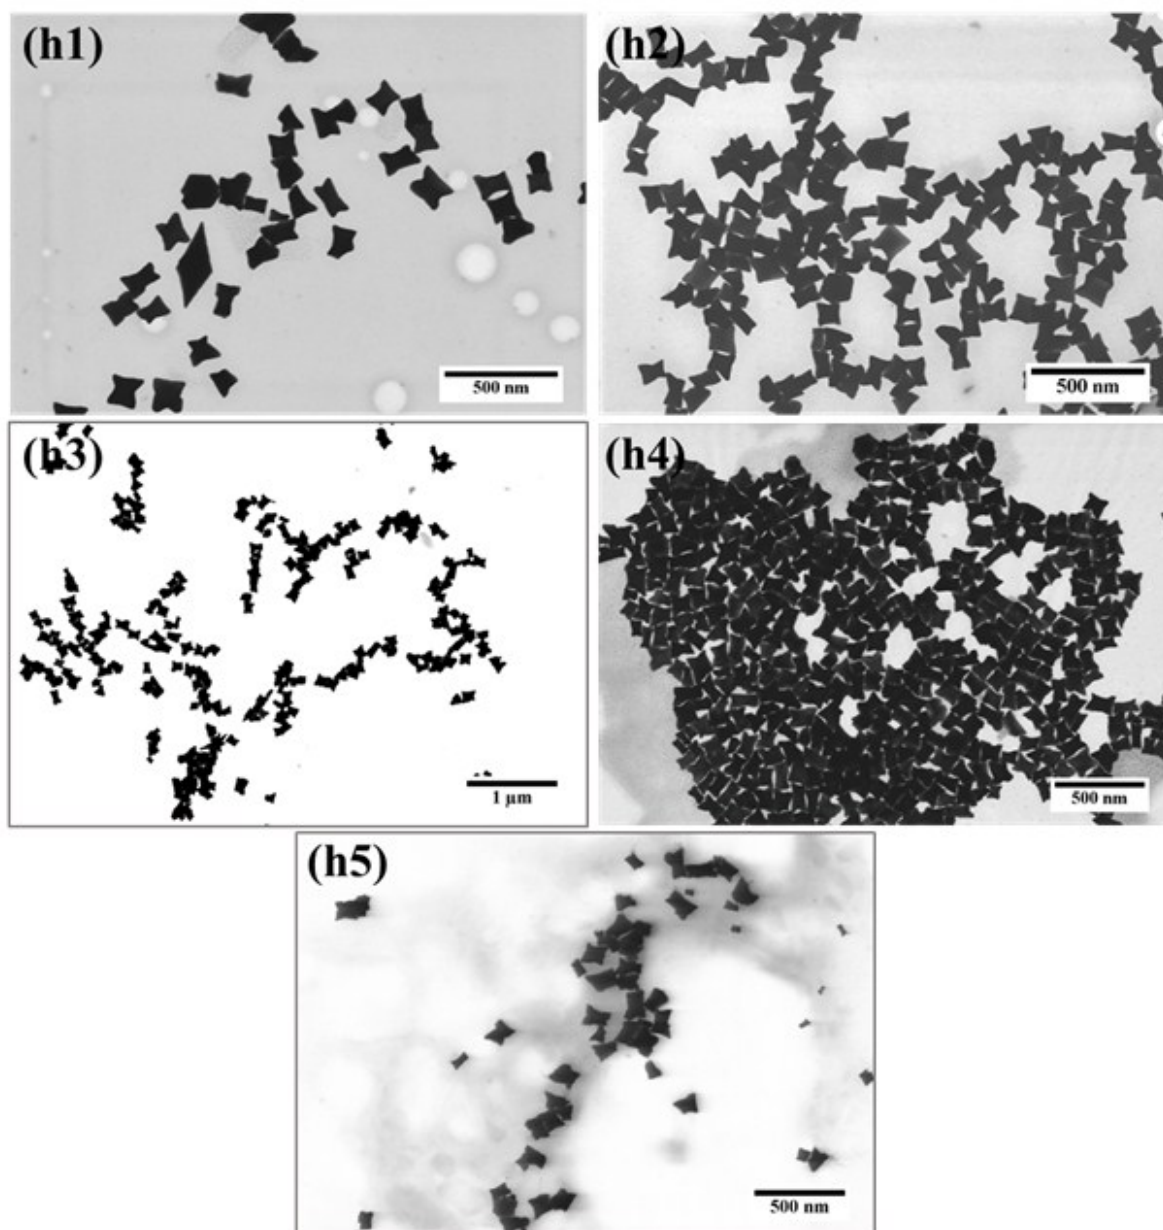

**Figure S8.** Representative S(T)EM images showing the effect of AsA on double seeded Au NPs.

**Table S3.** Fit parameters obtained for different conditions

| <b>Parameters</b> | <b>One hour</b>        | <b>Completion of Reaction</b> |
|-------------------|------------------------|-------------------------------|
| <b>a</b>          | 1.03                   | 1.24                          |
| <b>b</b>          | 259                    | 259                           |
| <b>x0</b>         | 1051                   | 1051                          |
| <b>y0</b>         | $-3.06 \times 10^{-2}$ | $-3.70 \times 10^{-2}$        |

### **Calculating kinetics of growing NPs**

A robust, repeatable method to calculate kinetics of growing NPs was used in the experiments mentioned in Table S1. The method development is laid out in this section. Figure 5(a) shows some of the UV-Vis measurements of growing NRs taken at different time points from 0 to 60 mins from the start of the reaction (addition of seeds). Figure 5(b) shows the area under all the curves obtained from UV-Vis. The area plot shows that there is an initial lag phase where the area increases slightly. This is followed by exponential growth and finally reaches a region where the area remains constant. The time taken to reach this final stage varies for different NPs. The area under the curve obtained was normalized against the area obtained after completion of the reaction. The fit parameters obtained were compared against the fit parameters from the area obtained once the area starts to remain constant. The UV-Vis measurements were done until a constant area is obtained or at least for one hour. The fit parameters obtained when the normalization is done using the area after one hour and after the completion of reaction are shown in Table S3.

For ease of analysis, normalization with area obtained after reaching constant values can be performed. Only a small volume is used in UV-Vis measurements (3.5 ml from ~30ml), normalization was done using areas obtained from the cuvette measurements and from bulk (3.5ml was withdrawn after one hour from the reaction mixture and measured in UV-Vis). The

parameters obtained from curve fits were the same indicating that the cuvette is a representation of reactions happening in the bulk.

**Table S4.** Comparison between fit parameters obtained for different wavelength ranges for NRs

| <b>Parameters</b>    | <b>Transverse axis<br/>(400-650nm)</b> | <b>Longitudinal Axis<br/>(650-900nm)</b> | <b>Au NPs<br/>(400-900nm)</b> |
|----------------------|----------------------------------------|------------------------------------------|-------------------------------|
| <b>a</b>             | $9.79 \times 10^{-1}$                  | $9.99 \times 10^{-1}$                    | $9.86 \times 10^{-1}$         |
| <b>b</b>             | 138                                    | 121                                      | 128                           |
| <b>x<sub>0</sub></b> | 593                                    | 632                                      | 615                           |
| <b>y<sub>0</sub></b> | $2.01 \times 10^{-2}$                  | $1.40 \times 10^{-2}$                    | $1.39 \times 10^{-2}$         |

**Table S5.** First-order rate constants k comparing shelf life of chemicals

|                                 | <b>k (s<sup>-1</sup>) – one-day shelf life</b> | <b>k (s<sup>-1</sup>)</b>                     |
|---------------------------------|------------------------------------------------|-----------------------------------------------|
| <b>Without AgNO<sub>3</sub></b> | $2.58 \times 10^{-3} \pm 1.47 \times 10^{-5}$  | $3.42 \times 10^{-3} \pm 1.05 \times 10^{-3}$ |
| <b>With AgNO<sub>3</sub></b>    | $1.29 \times 10^{-3} \pm 7.92 \times 10^{-5}$  | $1.09 \times 10^{-3} \pm 2.28 \times 10^{-4}$ |
| <b>With OA</b>                  | $2.27 \times 10^{-3} \pm 1.64 \times 10^{-4}$  | $2.34 \times 10^{-3} \pm 9.61 \times 10^{-4}$ |

**Table S6.** Comparison between sigmoidal fit and exponential fit for various reaction conditions



| <b>Experiment</b>    | <b>Sigmoidal fit</b>  | <b>Exponential fit</b> |
|----------------------|-----------------------|------------------------|
| <b>Without AgNO3</b> | $2.59 \times 10^{-3}$ | $2.52 \times 10^{-3}$  |
| <b>With AgNO3</b>    | $1.30 \times 10^{-3}$ | $1.28 \times 10^{-3}$  |
| <b>With OA</b>       | $2.28 \times 10^{-3}$ | $2.26 \times 10^{-3}$  |
| <b>Double Seeded</b> | $5.61 \times 10^{-4}$ | $5.51 \times 10^{-4}$  |

### **Comparison between sigmoidal fit and exponential fit**

The sigmoidal nature of curves obtained for these NPs shows an initial exponential growth. The time taken for the area under the curves to reach the maximum values is short when compared to the total reaction time. For a quick calculation of kinetics or for the NPs whose time progression is known, the UV-Vis measurements can be done for the initial growth and exponential rise to maximum fit can be used. The equation for this fit:

$$y = y_0 + a \exp(bx)$$

The rate constants calculated by fitting sigmoidal fit and the exponential fit for different experiments are shown in Table S5. Although similar results are obtained, the sigmoidal fit is recommended when calculating the kinetics for the first time for a given experimental condition as this method includes more data points.

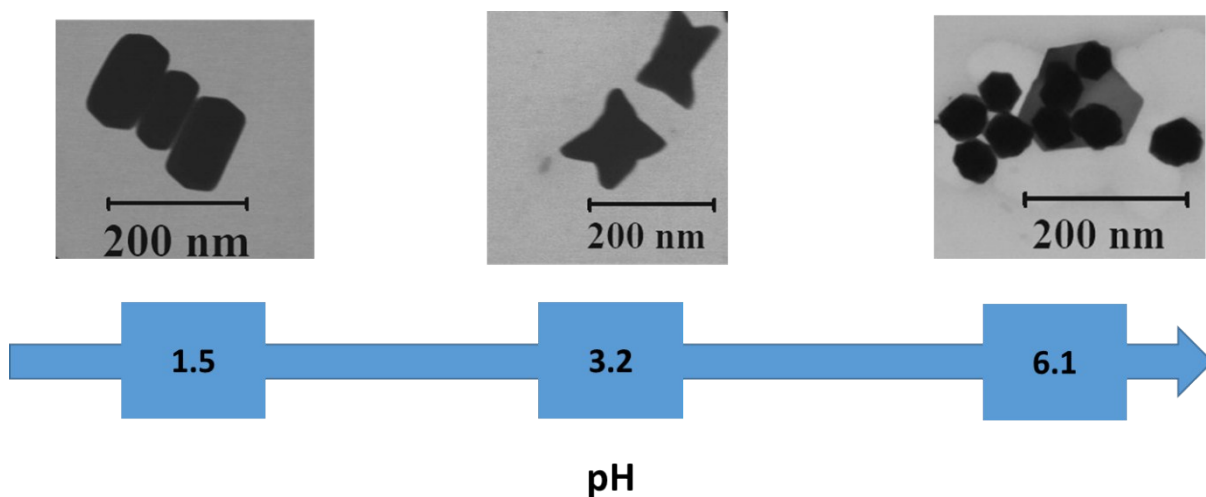

**Figure S9.** Representative S(T)EM images showing the effect of pH on double seeded Au NPs.

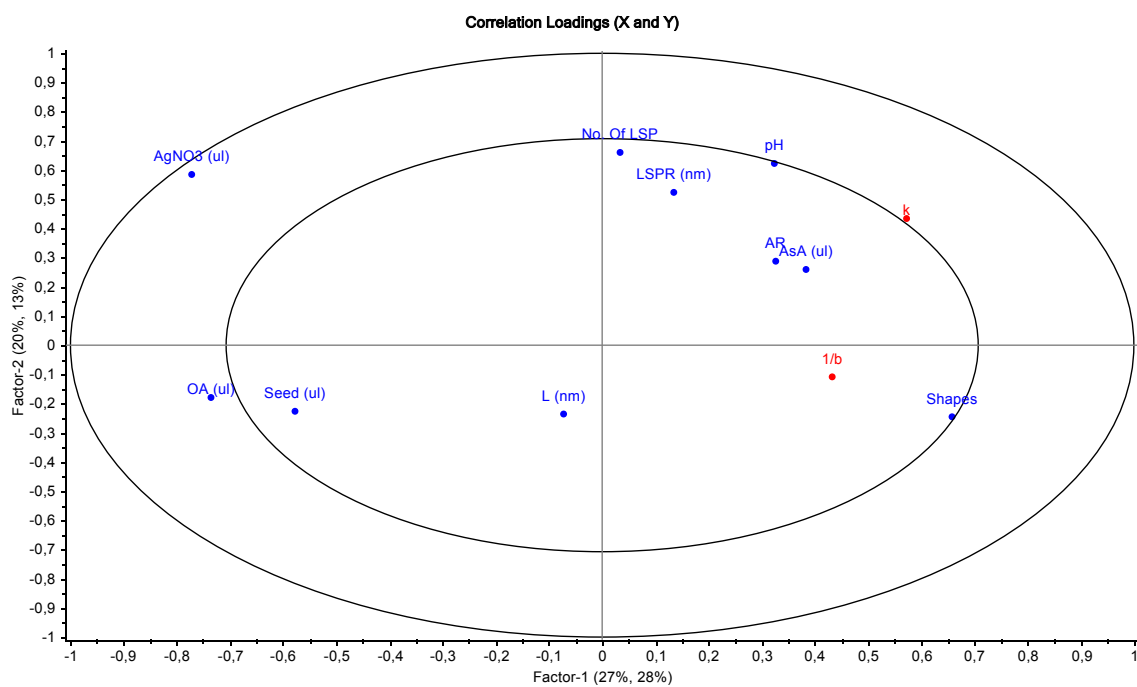

**Figure S10.** Correlation loadings diagram with k and 1/b as output

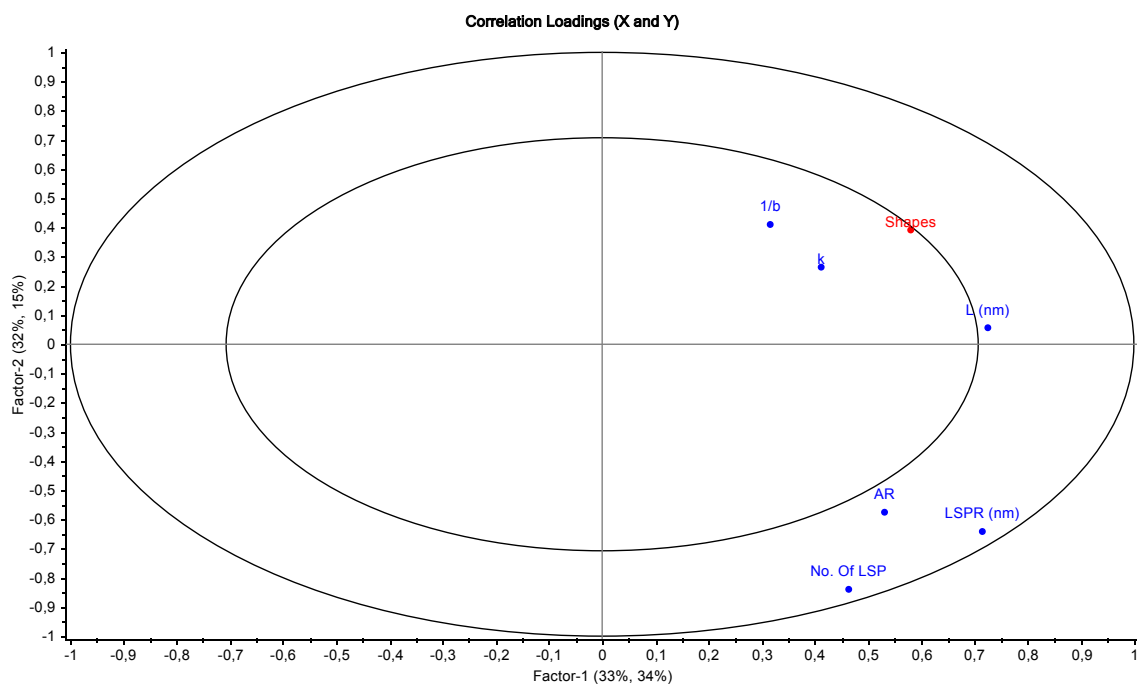

**Figure S11.** Correlation loadings diagram with shape as output

The correlation loading plots S10 and S11 are based on Table S2. For each model used by UnScramblerX for a given dataset, the variable in the outer ellipse explain 100% of the variations in the data whereas the variables in the inner ellipse explain 50% of the variance. Although from Figure S11 1/b and k appear to be equidistant from shape, in Figure S10 k can explain the variance in the dataset better than 1/b for the model. The results corroborate with the low standard deviations observed in k for repeats when compared with 1/b obtained for the same experiments, shown in Table S7.

|                                 | <b>k (s<sup>-1</sup>)</b>                     | <b>1/b (s<sup>-1</sup>)</b>                    |
|---------------------------------|-----------------------------------------------|------------------------------------------------|
| <b>Without AgNO<sub>3</sub></b> | $2.58 \times 10^{-3} \pm 1.47 \times 10^{-5}$ | $31.97 \times 10^{-2} \pm 7.26 \times 10^{-4}$ |
| <b>With AgNO<sub>3</sub></b>    | $1.29 \times 10^{-3} \pm 7.92 \times 10^{-5}$ | $9.11 \times 10^{-3} \pm 3.04 \times 10^{-4}$  |
| <b>With OA</b>                  | $2.27 \times 10^{-3} \pm 1.64 \times 10^{-4}$ | $1.57 \times 10^{-2} \pm 1.57 \times 10^{-3}$  |

**Table S7.** Comparison between k and (1/b) for different synthesis conditions

Correlation Loadings (X and Y)

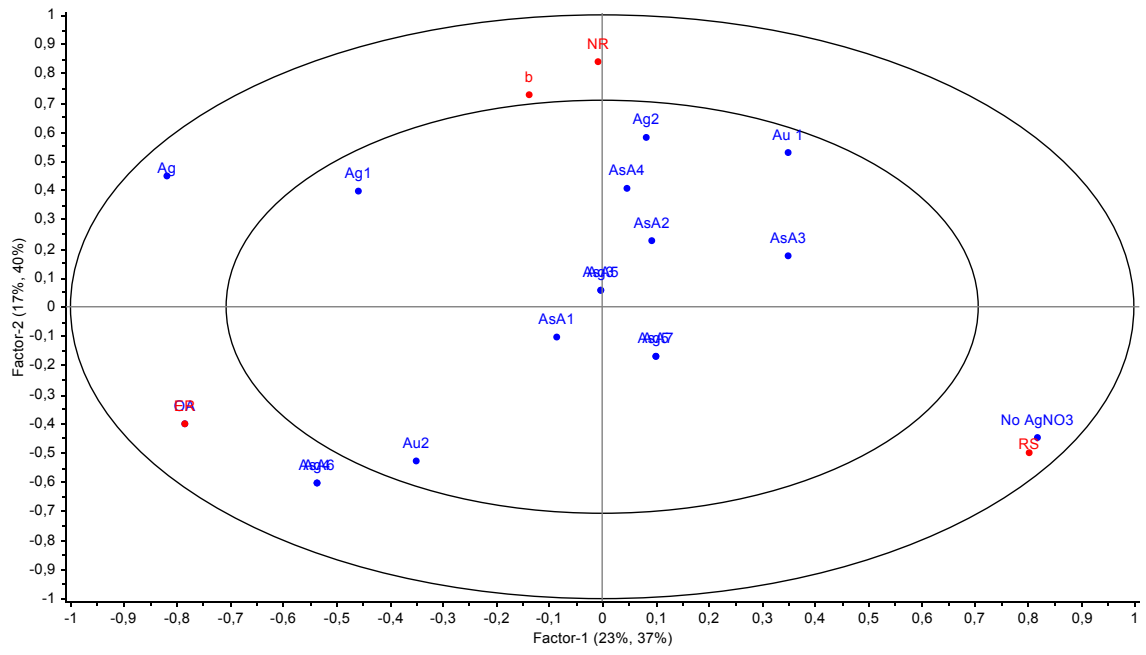

**a**

| Parameter Estimates |           |           |         |         |
|---------------------|-----------|-----------|---------|---------|
| Term                | Estimate  | Std Error | t Ratio | Prob> t |
| Intercept           | 0.0081264 | 0.001627  | 5.00    | <.0001* |
| LSPR                | -1.648e-5 | 2.919e-6  | -5.65   | <.0001* |
| No of LSPR peaks    | 0.0011226 | 0.00037   | 3.03    | 0.0051* |
| AsA                 | 4.7286e-6 | 1.648e-6  | 2.87    | 0.0076* |
| pH                  | 0.000487  | 0.000115  | 4.23    | 0.0002* |

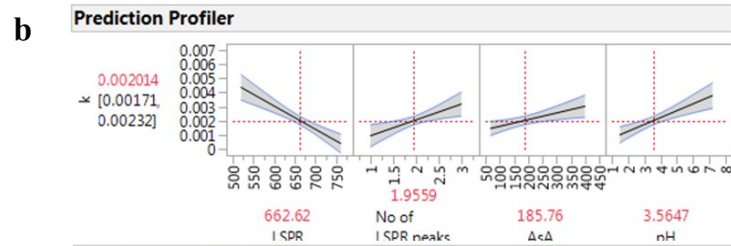

**c**

| Parameter Estimates |           |           |         |         |
|---------------------|-----------|-----------|---------|---------|
| Term                | Estimate  | Std Error | t Ratio | Prob> t |
| Intercept           | 56.769004 | 41.87957  | 1.36    | 0.1861  |
| AgNO3               | -0.061936 | 0.017196  | -3.60   | 0.0012* |
| k                   | -13127.9  | 2445.734  | -5.37   | <.0001* |
| LSPR                | 0.2333769 | 0.076483  | 3.05    | 0.0049* |
| AR                  | -37.83461 | 4.496898  | -8.41   | <.0001* |

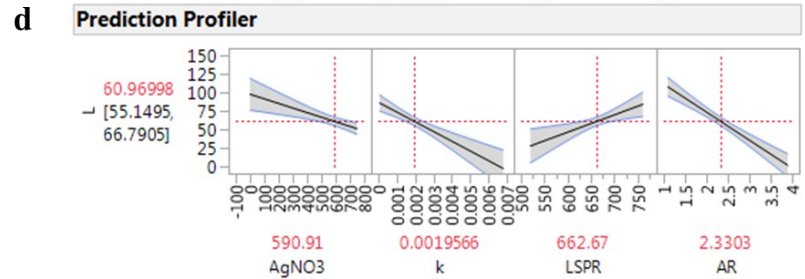

**e**

| Parameter Estimates |           |           |         |         |
|---------------------|-----------|-----------|---------|---------|
| Term                | Estimate  | Std Error | t Ratio | Prob> t |
| Intercept           | 282.50471 | 25.45569  | 11.10   | <.0001* |
| OA                  | 1.2682484 | 0.61445   | 2.06    | 0.0487* |
| AgNO3               | 0.106965  | 0.02522   | 4.24    | 0.0002* |
| AsA                 | 0.1298227 | 0.045139  | 2.88    | 0.0078* |
| No of LSPR peaks    | 45.860822 | 9.428898  | 4.86    | <.0001* |
| L                   | 0.8998596 | 0.15581   | 5.78    | <.0001* |
| AR                  | 56.133334 | 8.629902  | 6.50    | <.0001* |

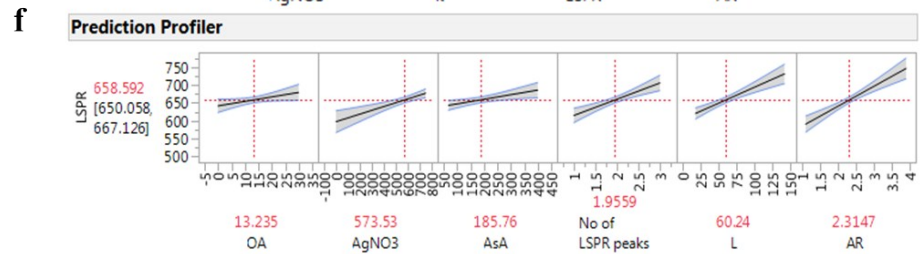

**g**

| Parameter Estimates |           |           |         |         |
|---------------------|-----------|-----------|---------|---------|
| Term                | Estimate  | Std Error | t Ratio | Prob> t |
| Intercept           | -3.518514 | 0.707808  | -4.97   | <.0001* |
| k                   | 162.42763 | 52.9271   | 3.07    | 0.0044* |
| LSPR                | 0.0077643 | 0.000959  | 8.10    | <.0001* |

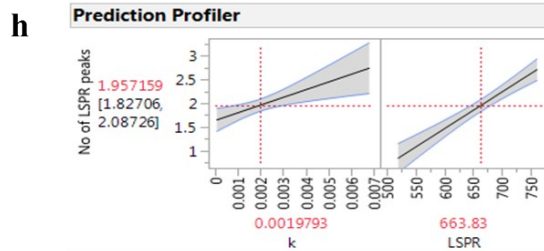

**i**

| Parameter Estimates |           |           |         |         |
|---------------------|-----------|-----------|---------|---------|
| Term                | Estimate  | Std Error | t Ratio | Prob> t |
| Intercept           | 0.82448   | 0.496434  | 1.66    | 0.1079  |
| OA                  | -0.02441  | 0.004948  | -4.93   | <.0001* |
| AsA                 | -0.001541 | 0.000521  | -2.96   | 0.0062* |
| pH                  | -0.209796 | 0.040325  | -5.20   | <.0001* |
| LSPR                | 0.0052995 | 0.000618  | 8.58    | <.0001* |
| L                   | -0.010681 | 0.001784  | -5.99   | <.0001* |

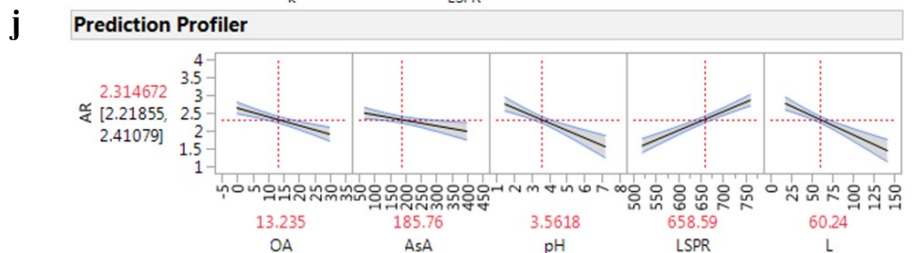

**Figure S12.** Correlation loadings diagram for different shapes and fit parameter b

**Figure S13.** Multivariate Linear Regression obtained from JMP (a) and (b) Parameter estimated and predictor profile when y variable is k. (c) and (d) Parameter estimated and predictor profile when y variable is L. (e) and (f) Parameter estimated and predictor profile when y variable is LSPR. (g) and (h) Parameter estimated and predictor profile when y variable is No of LSPR peaks. (i) and (j) Parameter estimated and predictor profile when y variable is AR.

Linear regression analysis was performed using JMP. The following are the predictor estimates and predictor profiler for the different y variables obtained from JMP software. The predictor estimate shows the modal with its standard deviation along with its confidence interval. The predictor profiler shows the behavior of the model.
